# Supplementary material for: A miniaturized chemiluminescence detection system for a microfluidic paper-based analytical device and its application to the determination of chromium(iii)
Source: Royal Society of Chemistry journal article supplement (doi:10.1039/c6ay00954a), 2016-01-01
Supplement: c6ay00954a1.pdf [file c6ay00954a1.pdf]

## Supplementary Information for:

# Miniaturized chemiluminescence detection system for a microfluidic paper-based analytical device and its application to the determination of chromium (III)

Waleed Alahmad,<sup>a,b</sup> Kanchana Uraisin,<sup>a,b</sup> Duangjai Nacapricha,<sup>a,b</sup> and Takashi Kaneta<sup>\*c</sup>,

<sup>a</sup>*Flow Innovation-Research for Science and Technology Laboratories (FIRST labs)*

<sup>b</sup>*Department of Chemistry and Center of Excellence for Innovation in Chemistry,  
Faculty of Science, Mahidol University, Bangkok 10400, Thailand*

<sup>c</sup>*Department of Chemistry, Graduate School of Natural Science and Technology, Okayama  
University, Okayama, 700-8530 Japan*

Corresponding Author

\*E-mail: kaneta@okayama-u.ac.jp. Tel: +81-86-251-7847. Fax: +81-86-251-7847.

## Contents

|                                                                                                                   |     |
|-------------------------------------------------------------------------------------------------------------------|-----|
| Scheme S1. Reaction scheme of the Cr (III)-catalyzed oxidation of luminol.....                                    | S-2 |
| Fig. S1. The design of the $\mu$ PAD.....                                                                         | S-3 |
| Fig. S2. Photos of an acrylic holder.....                                                                         | S-4 |
| Fig. S3. Effect of hydrogen peroxide concentration on CL intensity.....                                           | S-5 |
| Fig. S4. Effect of hydrogen peroxide concentration on CL intensity.....                                           | S-5 |
| Fig. S5. Effect of sodium bromide concentration on CL intensity.....                                              | S-6 |
| Table S1. Common concentrations of heavy metals in natural water and the tested concentrations in this study..... | S-7 |

(A)

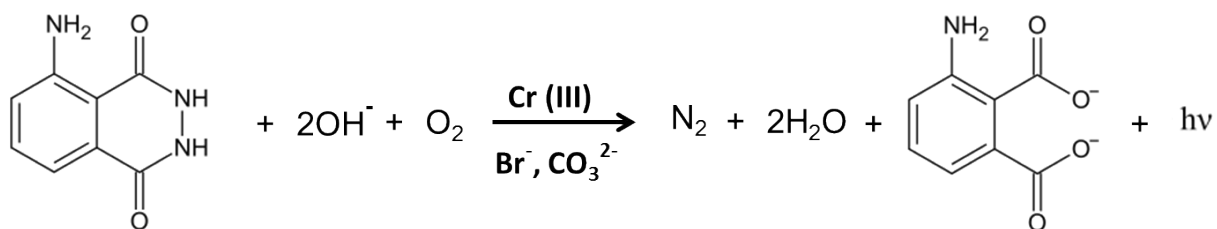

(B)

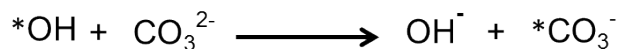

(C)

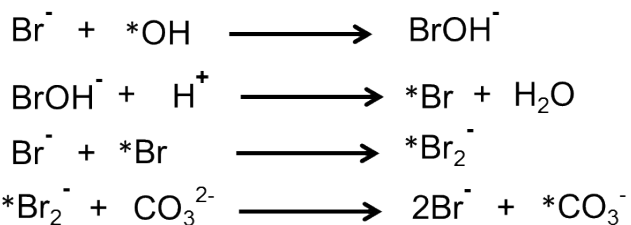

(D)

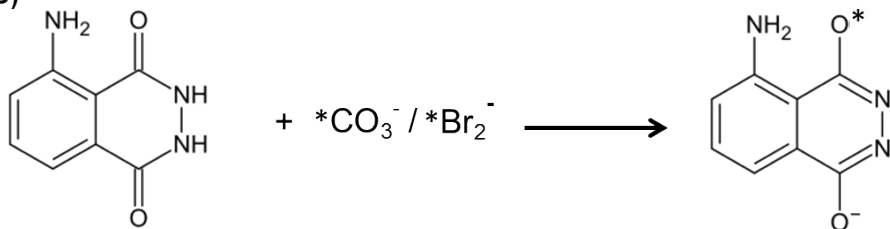

Scheme S1. Reaction scheme of the Cr (III)-catalyzed oxidation of luminol. (A) The Cr (III)-catalyzed oxidation of luminol by hydrogen peroxide in the presence of  $\text{Br}^-$  and  $\text{CO}_3^{2-}$  used as enhancers. (B) and (C) Generation of a carbonate radical and a bromide radical via a hydroxyl radical. (D) The reaction between a carbonate radical/bromide radical with luminol to yield a luminol radical.

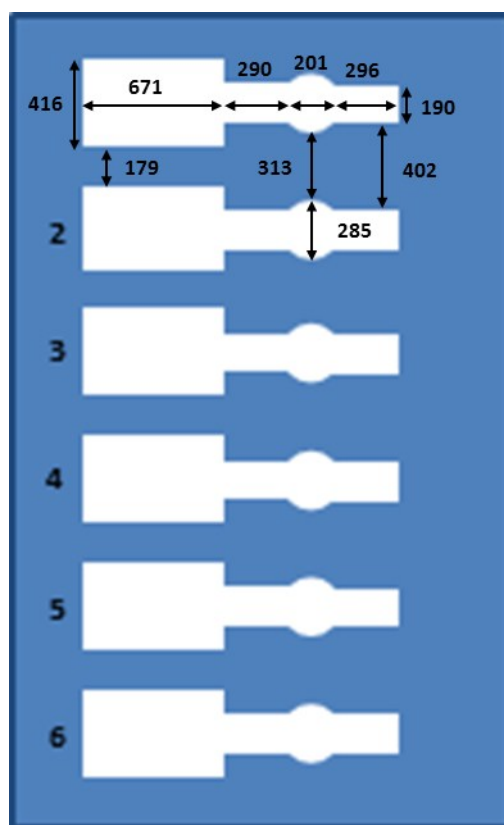

Figure S1. The design of the  $\mu$ PAD (before heating).  
The dimensions are indicated in millimeters.

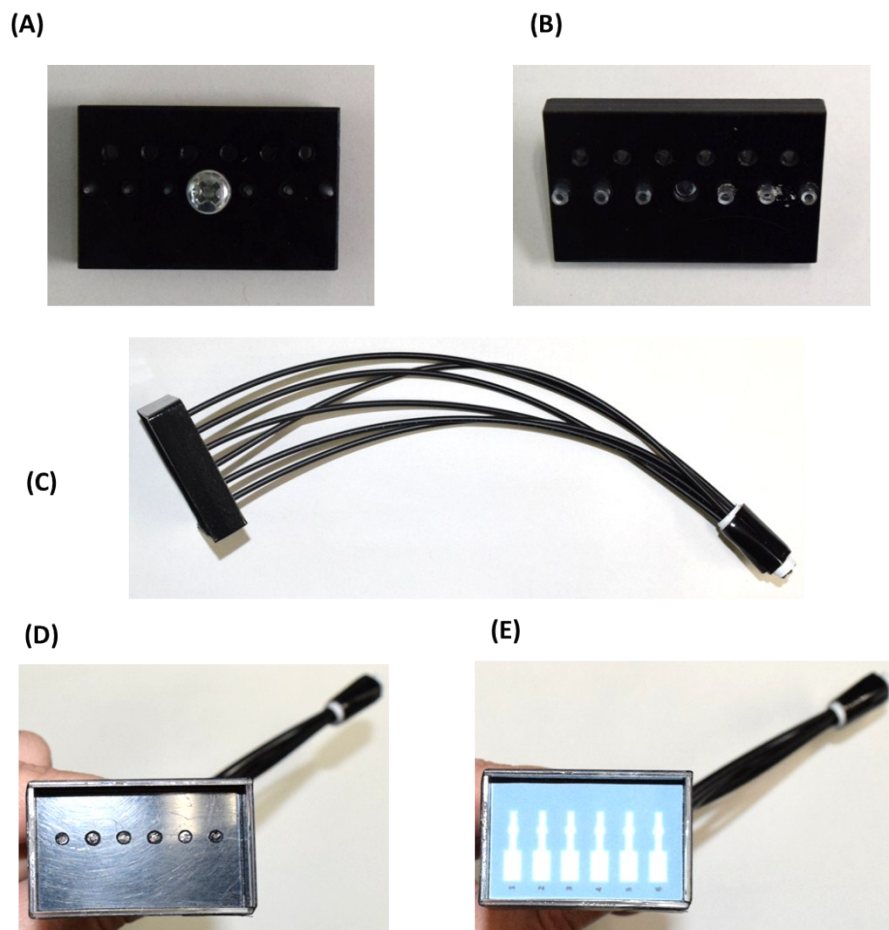

Figure S2. Photos of an acrylic holder's parts.

**(A)** The cover plate (Top View).

**(B)** The cover plate (bottom View).

**(C)** The holder plate after connection with optical fibers (Side View).

**(D)** The holder plate after connection with optical fibers (Top View).

**(E)** The holder plate after connection with optical fibers and the  $\mu$ PAD placed on it (Top View).

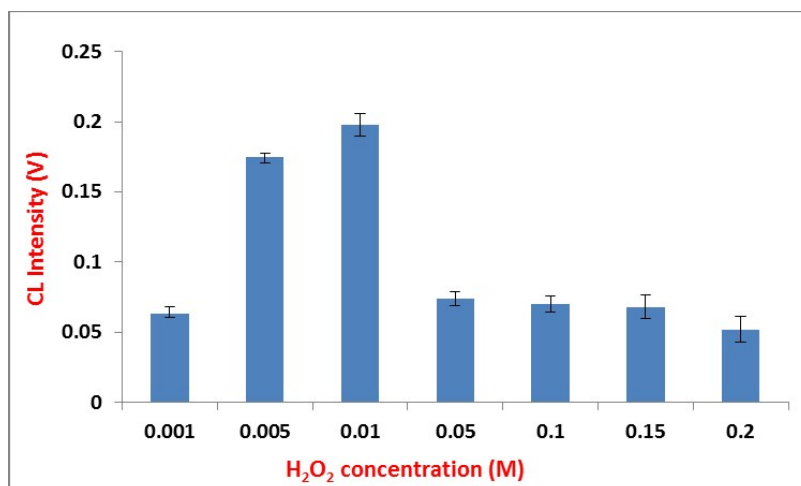

Fig. S3. Effect of hydrogen peroxide concentration on CL intensity.

Cr (III) 3 ppm. CL reaction solution:  $10 \times 10^{-4}$  M luminol,  $1.0 \times 10^{-1}$  M NaBr and  $1.0 \times 10^{-2}$  M EDTA in  $5.0 \times 10^{-2}$  M NaHCO<sub>3</sub>–Na<sub>2</sub>CO<sub>3</sub> buffer, pH of CL reagent 12.1

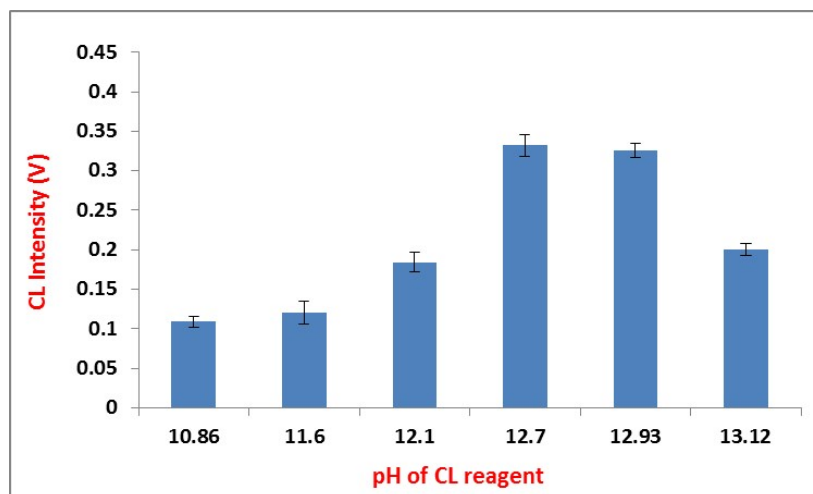

Fig. S4. Effect of pH on CL intensity.

Cr (III) 3 ppm. CL reaction solution:  $1.0 \times 10^{-2}$  M hydrogen peroxide,  $10 \times 10^{-4}$  M luminol,  $1.0 \times 10^{-1}$  M NaBr and  $1.0 \times 10^{-2}$  M EDTA in  $5.0 \times 10^{-2}$  M NaHCO<sub>3</sub>–Na<sub>2</sub>CO<sub>3</sub> buffer.

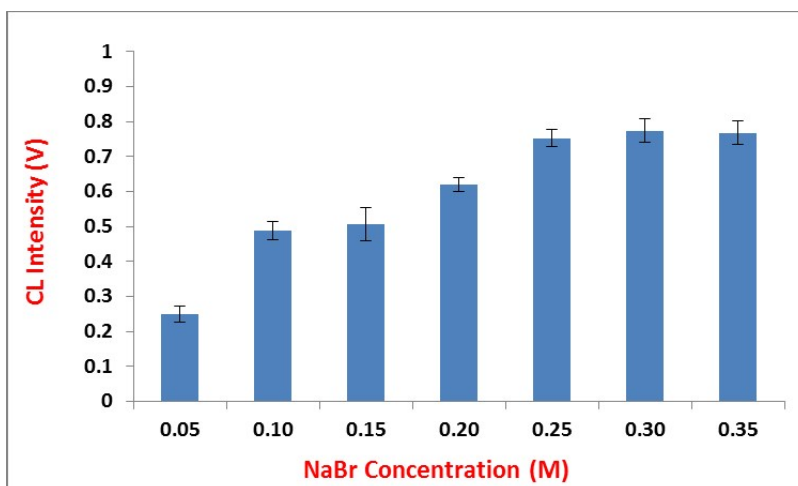

Fig. S5. Effect of sodium bromide concentration on CL intensity.

Cr (III) 3 ppm. CL reaction solution:  $1.0 \times 10^{-2}$  M hydrogen peroxide,  $10 \times 10^{-4}$  M luminol and  $1.0 \times 10^{-2}$  M EDTA in  $5.0 \times 10^{-2}$  M  $\text{NaHCO}_3$ – $\text{Na}_2\text{CO}_3$  buffer, pH of CL reagent 12.7.

Table S1. Common concentrations of heavy metals in natural water and the tested concentration in this study.

| Interfering species          | Common Concentration in natural water/<br>ppm |                                     | Tested<br>Concentration/ ppm |
|------------------------------|-----------------------------------------------|-------------------------------------|------------------------------|
|                              | River water <sup>a</sup>                      | Tap water                           |                              |
| <b>Cr (III)</b> <sup>1</sup> | $0.34 \times 10^{-3}$                         | $0.33 \times 10^{-3}$ <sup>b</sup>  | —                            |
| <b>Cr (VI)</b> <sup>1</sup>  | $0.36 \times 10^{-3}$                         | $0.13 \times 10^{-3}$ <sup>b</sup>  | 5.00 Cr (VI)                 |
| <b>Pb</b> <sup>2</sup>       | $0.48 \times 10^{-3}$                         | $0.10 \times 10^{-3}$ <sup>c</sup>  | 2.00 Pb (II)                 |
| <b>Zn</b> <sup>2</sup>       | $6.80 \times 10^{-3}$                         | $0.80 \times 10^{-3}$ <sup>c</sup>  | 10.00 Zn (II)                |
| <b>Cu</b> <sup>2</sup>       | $1.80 \times 10^{-3}$                         | $7.30 \times 10^{-3}$ <sup>c</sup>  | 5.00 Cu (II)                 |
| <b>Cd</b> <sup>2</sup>       | $0.09 \times 10^{-3}$                         | $0.006 \times 10^{-3}$ <sup>c</sup> | 3.00 Cd (II)                 |
| <b>Ni</b> <sup>2</sup>       | $0.94 \times 10^{-3}$                         | $0.75 \times 10^{-3}$ <sup>c</sup>  | 10.00 Ni (II)                |
| <b>Mn</b> <sup>2</sup>       | $5.20 \times 10^{-3}$                         | $0.20 \times 10^{-3}$ <sup>c</sup>  | 5.00 Mn (II)                 |
| <b>Fe</b> <sup>2</sup>       | $103 \times 10^{-3}$ <sup>d</sup>             | $3.7 \times 10^{-3}$ <sup>c</sup>   | 5.00 Fe (III)                |

<sup>a</sup> Zasu River located in Okayama City, Japan.

<sup>b</sup> Tap water from Faculty of Science, Okayama University, Japan.

<sup>c</sup> Tap water from VBL Okayama University, Japan.

<sup>d</sup> River-water reference material for trace metals issued by National Research Council Canada (SLRS-4).

## References

1. S. Motomizu, K. Jitmanee and M. Oshima, *Anal. Chim. Acta*, 2003, **499**, 149-155.
2. R. K. Katarina, N. Lenghor and S. Motomizu, *Anal. Sci.*, 2007, **23**, 343-350.
